# Supplementary material
Source: bioRxiv or medRxiv preprint supplement (https://www.biorxiv.org/highwire/filestream/113482/field_highwire_adjunct_files/0/373977-1.pdf)
Supplement: Supplementary file [file 373977-1.pdf]

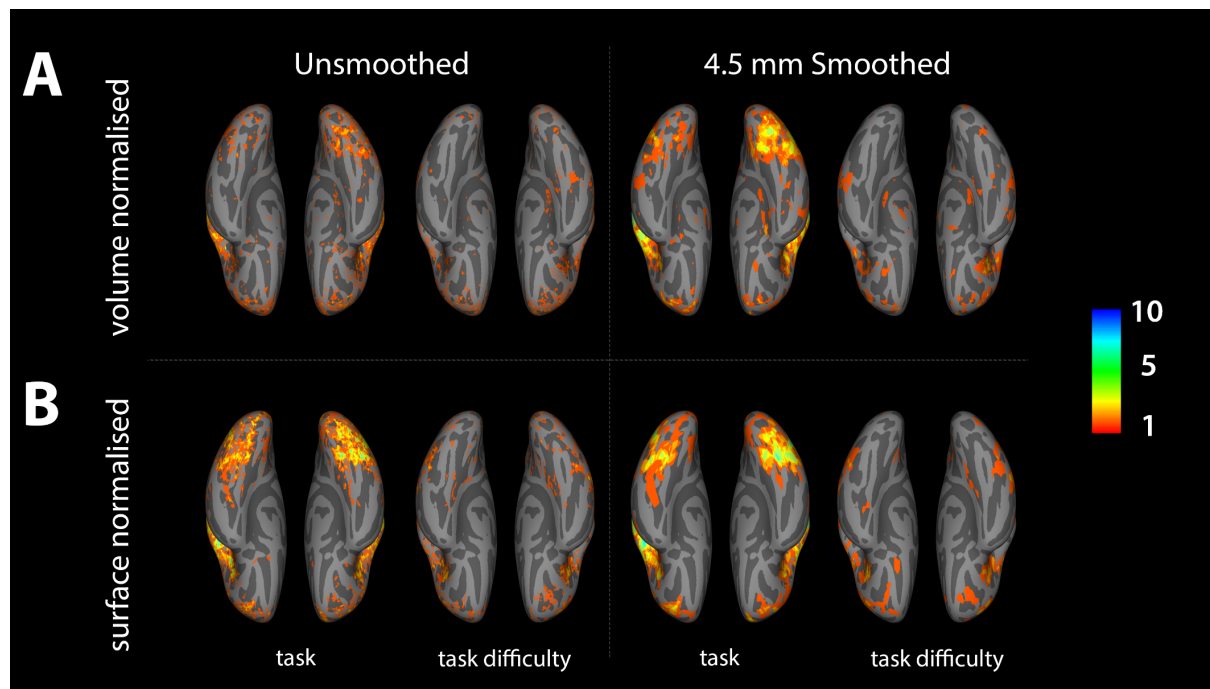

**Figure S1.** Inferior views of the group conjunction of individual subject T-stat maps (FWE  $p < 0.05$ ) showing number of subjects with overlapping activation using different processing pipelines with **A**: volume normalisation, **B**: surface normalisation. For A) and B) results are shown for unsmoothed (left) and smoothed (4.5 mm FWHM kernel) data (right). For superior views, see Fig. 10.

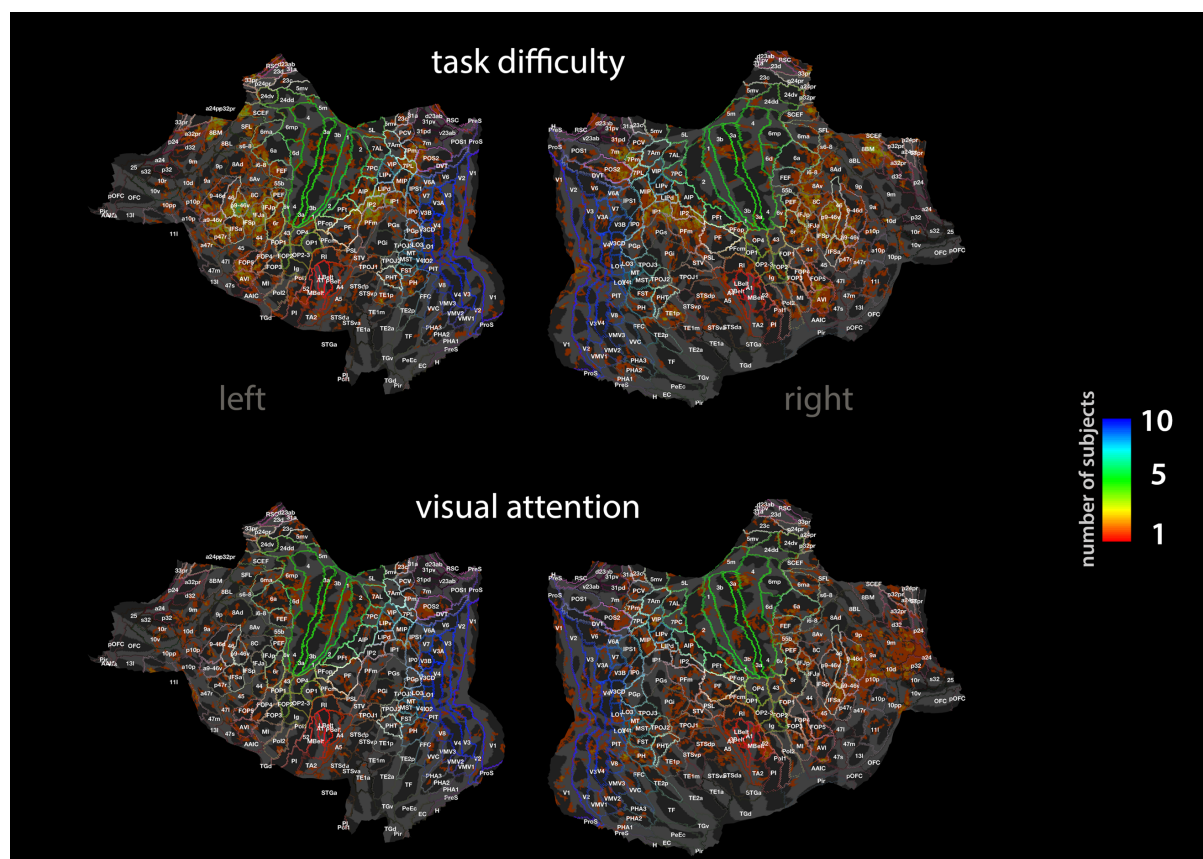

**Figure S2.** Conjunction of individual subject T-stat maps (FWE  $p < 0.05$ ) for task difficulty contrast (**top**, denoting “n”-shaped modulation) and visual attention contrast (**bottom**, denoting positive, linear modulation) using the optimal surface registration with no smoothing processing pipeline.

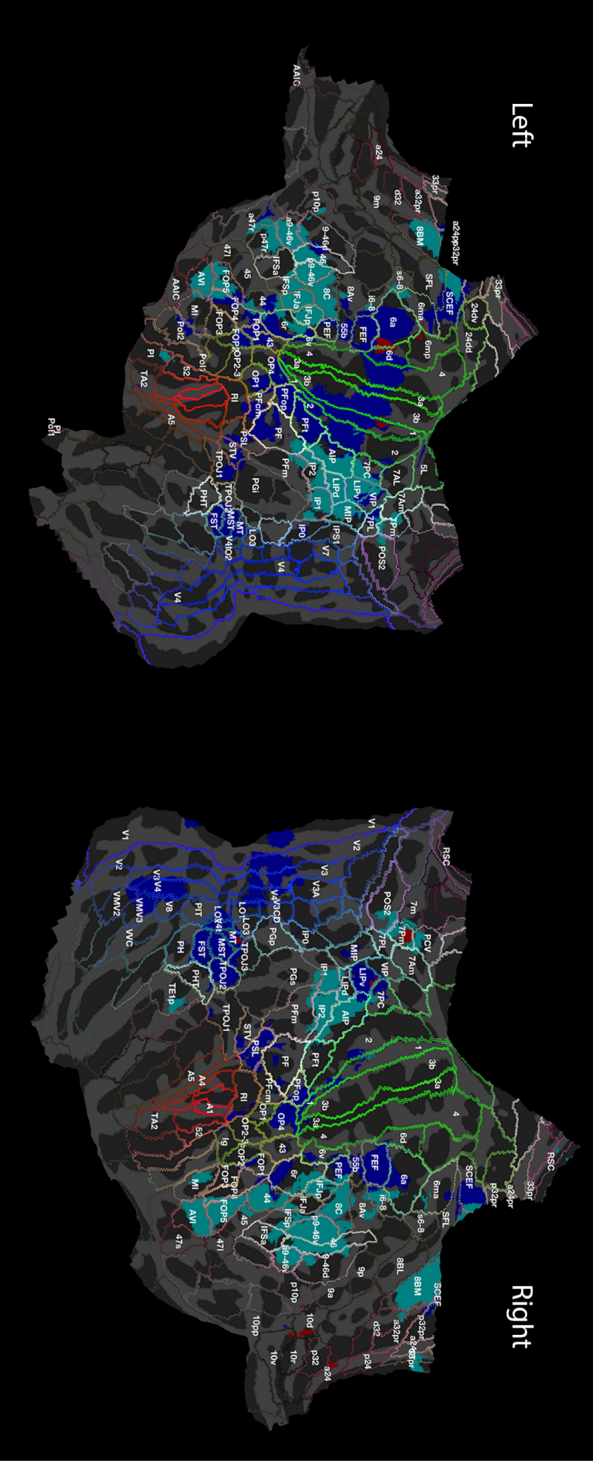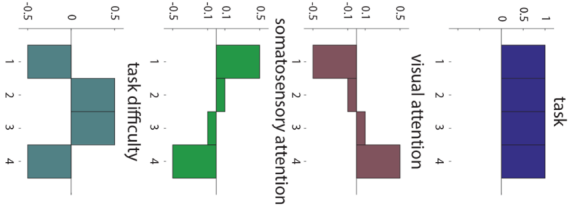

**Figure S3:** 2<sup>nd</sup> level GLM analyses of the volume normalised, smoothed attention data. Fixed effects ( $p < 0.05$ , FWE corrected) activation maps (corresponding to mixed effects analysis in Figure 13). Colours denote regions where the t-statistics for each of the contrasts exceeded the stated threshold, and were deemed “activated” regions to that contrast, with different contrast and associated colours shown in right hand panel.
